# Supplementary material
Source: ML conference proceedings conference paper supplement (https://openaccess.thecvf.com/content/ICCV2025/html/Xu_BANet_Bilateral_Aggregation_ICCV_2025_paper.html)
Supplement: Supplementary file 1 [file Xu_BANet_Bilateral_Aggregation_ICCV_2025_supplemental.pdf]

# BANet: Bilateral Aggregation Network for Mobile Stereo Matching

## Supplementary Material

| Method            | KITTI 2012 (Reflective) |             |             |             |
|-------------------|-------------------------|-------------|-------------|-------------|
|                   | 3-noc                   | 3-all       | 4-noc       | 4-all       |
| BGNet+ [50]       | 6.44                    | 8.41        | 4.26        | 5.80        |
| AANet+ [58]       | 7.22                    | 9.10        | 5.25        | 6.66        |
| CoEx [1]          | 6.83                    | 8.63        | 4.61        | 6.00        |
| Fast-ACVNet+ [55] | 6.82                    | 8.59        | 4.83        | 6.06        |
| HITNet [42]       | 5.91                    | 7.54        | 4.04        | 5.34        |
| w/o BA (2D)       | 8.81                    | 10.61       | 6.17        | 7.63        |
| BANet-2D          | <u>5.59</u>             | <u>7.27</u> | <u>3.77</u> | <u>5.08</u> |
| w/o BA (3D)       | 6.10                    | 8.06        | 4.14        | 5.63        |
| BANet-3D          | <b>5.37</b>             | <b>7.07</b> | <b>3.64</b> | <b>4.89</b> |

Table 6. Quantitative evaluation in reflective (ill-posed) regions of the KITTI 2012 test set.

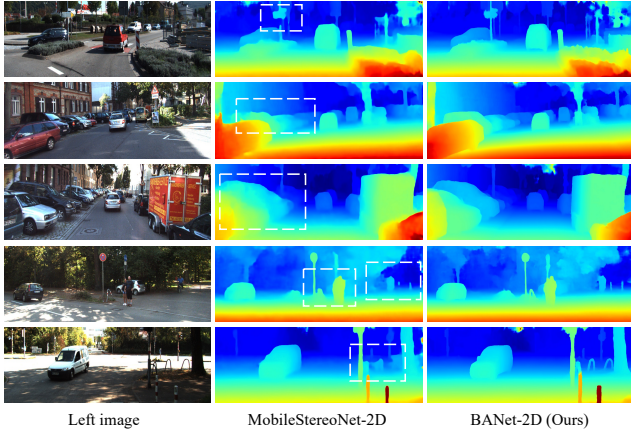

Figure 5. Qualitative comparisons with MobileStereoNet-2D [39] on the test set of KITTI 2015 [35]. Significant improvements are highlighted by white dashed boxes. Our bilateral aggregation produces clear edges and preserves intricate details. Zoom in for a clearer view.

## 6. More Experimental Results

### 6.1. Performance in Reflective Regions

To verify the performance of our bilateral aggregation (BA) in smooth regions, such as reflective regions. We compared our approach with previously published real-time methods (on high-end GPUs) as well as our baseline method, which removes the bilateral aggregation (denoted as w/o BA). The comparison results are presented in Tab. 6, where our BANet-3D achieves the best performance. Compared to other methods, our bilateral aggregation can adaptively

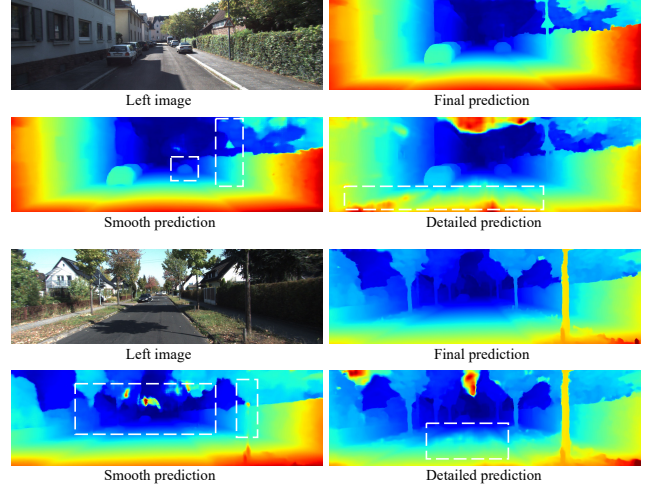

Figure 6. Visual results of the detailed aggregation branch, the smooth aggregation branch, and the final prediction.

separate the full cost volume into detailed and smooth cost volumes. This enables the smooth aggregation network to specialize in handling smooth regions, including reflective regions. As a result, our method outperforms previous approaches by a significant margin in reflective regions.

Specifically, compared to the baseline (w/o BA), our bilateral aggregation (BA) achieves a significant improvement, such as a 36.5% improvement for 2D convolution-based aggregation networks and a 12.0% improvement for 3D convolution-based ones.

### 6.2. More Qualitative Comparisons

As shown in Fig. 5, we provide more visual comparisons with MobileStereoNet-2D [39]. Both MobileStereoNet-2D and our BANet-2D rely solely on 2D convolutions, avoiding costly 3D convolutions or operations that are unfriendly to mobile devices. MobileStereoNet-2D struggles to simultaneously handle high-frequency edges and details, and low-frequency smooth regions, resulting in blurred edges and loss of fine details. In comparison, our method effectively addresses these challenges by the proposed bilateral aggregation. As a result, our approach produces clear edges and preserves intricate details.

### 6.3. Detailed and Smooth Visual Results

Fig. 6 shows visual results of the detailed aggregation branch, the smooth aggregation branch, and the final prediction. The smooth aggregation branch performs well in handling low-frequency smooth regions but struggles with

high-frequency edges and details, as indicated by the white dashed boxes in Fig. 6. In contrast, the detailed aggregation branch excels at handling high-frequency edges and details but underperforms in low-frequency smooth regions. Our final prediction combines the strengths of both branches, effectively addressing high-frequency edges and details while also handling low-frequency smooth regions.
